# Supplementary material for: miRBaseConverter: an R/Bioconductor package for converting and retrieving miRNA name, accession, sequence and family information in different versions of miRBase
Source: PubMed Central journal article supplement (PMC6311916; doi:10.1186/s12859-018-2531-5), 2018-12-31
Supplement: 12859_2018_2531_MOESM1_ESM.pdf [file 12859_2018_2531_MOESM1_ESM.pdf]

# Additional file 1 — The vignette of miRBaseConverter

## Contents

|     |                                                                                |    |
|-----|--------------------------------------------------------------------------------|----|
| 1   | Overview . . . . .                                                             | 2  |
| 2   | miRNA Version check . . . . .                                                  | 2  |
| 3   | The conversion between miRBase Accession and miRNA Name. . . . .               | 3  |
| 3.1 | miRBase Accession to miRNA Name . . . . .                                      | 3  |
| 3.2 | miRNA Name to miRBase Accession . . . . .                                      | 4  |
| 4   | The conversion of miRNA Names between two different miR-Base versions. . . . . | 4  |
| 4.1 | Solution 1: Global searching and matching . . . . .                            | 4  |
| 4.2 | Solution 2: miRNA Names conversion with three steps. . . . .                   | 5  |
| 5   | The conversion between Precursor and Mature miRNA . . . . .                    | 6  |
| 5.1 | Mature miRNA to Precursor. . . . .                                             | 6  |
| 5.2 | Precursor to Mature miRNA. . . . .                                             | 6  |
| 6   | Retrieve the Family category of miRNAs . . . . .                               | 7  |
| 7   | Retrieve some of detailed miRNA information in miRBase . . . . .               | 8  |
| 7.1 | Retrieve the Sequence of miRNAs . . . . .                                      | 8  |
| 7.2 | Retrieve all the miRBase version information . . . . .                         | 8  |
| 7.3 | Retrieve all the available species in miRBase . . . . .                        | 9  |
| 7.4 | Retrieve all the available miRNAs in the specified miRBase version. . . . .    | 10 |
| 7.5 | Retrieve all the history information of a single miRNA . . . . .               | 10 |
| 7.6 | Retrieve the data table for the specified miRBase version . . . . .            | 14 |
| 8   | The online retrieving of miRNA information . . . . .                           | 15 |
| 8.1 | Open the miRNA webpages in miRBase. . . . .                                    | 15 |
| 8.2 | Open the miRNA family webpages in miRBase . . . . .                            | 15 |
| 9   | Conclusion . . . . .                                                           | 16 |

## 1 Overview

---

**miRBaseConverter** is an R/Bioconductor package for converting and retrieving the definition of miRNAs ( Names, Accessions, Sequences, Families and others) in different [miRBase](#) versions ( From miRBase version 6 to version 22 [ The latest version ] ). A tiny built-in database is embedded in the *miRBaseConverter* R package for retrieving miRNA information efficiently.

*microRNAs*( *miRNAs*) are one of the essential molecules that play the important role in the post-transcriptional gene regulation. The studies about novel miRNA and their function discoveries have an explosive growth in the last decade. The [miRBase](#) database is the authority archive of miRNA annotations and sequences for all species. With the development of researches about miRNAs, the annotation of miRNA has been changed significantly and develops many different historical versions. Each of the previous versions has been adopted in many research literatures and databases. Due to the inconsistent of name annotation of miRNAs, there is a barrier for the later scholars to reuse the previous research results in a convenient way, especially for miRNA databases with thousands of entries. There are some webservers or R-based tools can handle the batch conversion of miRNA names. However, an easy-to-use and well-documented tool for miRNA conversion and information retrieval is still lack. We present the *miRBaseConverter* R package, a comprehensive tool for miRNA research, to provide a suite of tools for checking miRNA Name, Accession, Sequence, version and family and history information. The *miRBaseConverter* package can be competent for all species including Precursor and Mature miRNAs defined in miRBase.

In the following sections, we present the detail usage of the functions included in the *miRBaseConverter* package.

## 2 miRNA Version check

---

For a list of miRNA names without version information, users may need to check what is the most possible miRBase version. *miRBaseConverter* package provides an easy-to-use function `checkMiRNAVersion()` to address this issue with an straightforward result.

```
library(miRBaseConverter)
data(miRNATest)
miRNANames = miRNATest$miRNA_Name
version=checkMiRNAVersion(miRNANames, verbose = TRUE)
##      Version Proportion      Recommend
## 1      v6      12.33%
## 2     v7_1      18.67%
## 3      v8      18.83%
## 4     v8_1      20.33%
## 5     v8_2      20.5%
## 6      v9      22%
## 7     v9_1      26%
## 8     v9_2      26%
## 9      v10      29%
## 10    v10_1      29.5%
```

## Additional file 1 — The vignette of miRBaseConverter

```
## 11    v11    32.5%
## 12    v12    34%
## 13    v13    35.33%
## 14    v14    45.5%
## 15    v15    51.67%
## 16    v16    51.67%
## 17    v17    51.83%
## 18    v18    98.67% ***BEST Matched***
## 19    v19    90.83%
## 20    v20    82.83%
## 21    v21    78.5%
## 22    v22    77.67%
```

The output text in console shows the matched proportions in all the miRBase version and gives the recommended version which is the best matched with the highest proportion values. This function is of great helpful miRNA version checking of a chunk of miRNAs.

## 3 The conversion between miRBase Accession and miRNA Name

---

### 3.1 miRBase Accession to miRNA Name

An Accession is the identifier that define miRNA uniquely in miRBase. Users can apply Accessions to retrieve the entire information of the miRNAs in [miRBase](#). One of the most commonly used functions is to retrieve the corresponding miRNA name from Accession. The manual retrieval one by one in [miRBase](#) could be a tough work for a chunk of Accessions of interest. The function `miRNA_AccessionToName()` in *miRBaseConverter* package can conduct a high throughput transformation within quite short time.

```
library(miRBaseConverter)
data(miRNATest)
Accessions = miRNATest$Accession

#### 1. Convert to the Accessions to miRNA names in miRBase version 13
result1 = miRNA_AccessionToName(Accessions,targetVersion = "v13")
result1[c(341:345),]
##      Accession  TargetName
## 341 MIMAT0002843 hsa-miR-520b
## 342 MIMAT0001650 mtr-miR399c
## 343 MIMAT0000013 cel-miR-42
## 344 MIMAT0002885 osa-miR529a
## 345 MIMAT0011111      <NA>

####2. Convert to the Accessions to miRNA names in miRBase version 22.
result2 = miRNA_AccessionToName(Accessions,targetVersion = "v22")
result2[c(341:345),]
##      Accession  TargetName
## 341 MIMAT0002843 hsa-miR-520b-3p
```

## Additional file 1 — The vignette of miRBaseConverter

```
## 342 MIMAT0001650      mtr-miR399c
## 343 MIMAT0000013      cel-miR-42-3p
## 344 MIMAT0002885      osa-miR529a
## 345 MIMAT0011111      mtr-miR169b
```

### 3.2 miRNA Name to miRBase Accession

The conversion of miRNA Name to Accession is the reversion process. Due to the frequent changes of miRNA name in different versions, researches are likely to adopt the miRBase Accessions as the identifiers in most literatures and databases.

```
library(miRBaseConverter)
data(miRNATest)
miRNANames = miRNATest$miRNA_Name
result1 = miRNA_NameToAccession(miRNANames,version = "v18")
result1[c(341:345),]
##      miRNAName_v18      Accession
## 341 hsa-miR-520b MIMAT0002843
## 342 mtr-miR399c MIMAT0001650
## 343 cel-miR-42-3p MIMAT0000013
## 344 osa-miR529a MIMAT0002885
## 345 mtr-miR169j MIMAT0011111
```

## 4 The conversion of miRNA Names between two different miRBase versions

---

In *miRBaseConverter* package, there are two ways to conduct the conversion of miRNA Names between two different miRBase versions.

### 4.1 Solution 1: Global searching and matching

*miRBaseConverter* package provides the `miRNAVersionConvert()` function to detect all the match miRNA Names with the same Accession in all miRBase historical versions. The conversion result may not match to the unique Name for some miRNAs but it is useful for all possible information retrieval for the miRNAs of interest.

```
library(miRBaseConverter)
data(miRNATest)
miRNANames = miRNATest$miRNA_Name
result1 = miRNAVersionConvert(miRNANames,targetVersion = "v13",exact = TRUE)
## *****
## The multiple matched miRNAs are list below:
##      original      Version v13      Accession
## 1 hsa-let-7c hsa-let-7c&hsa-let-7c MI0000064&MIMAT0000064
## 2 cel-lsy-6 cel-lsy-6&cel-lsy-6 MI0000801&MIMAT0000749
```

## Additional file 1 — The vignette of miRBaseConverter

```
result1[c(341:345),]
##      OriginalName  TargetName  Accession
## 341 hsa-miR-520b hsa-miR-520b MIMAT0002843
## 342 mtr-miR399c mtr-miR399c MIMAT0001650
## 343 cel-miR-42-3p cel-miR-42 MIMAT0000013
## 344 osa-miR529a osa-miR529a MIMAT0002885
## 345 mtr-miR169j      <NA>      <NA>

result2 = miRNAVersionConvert(miRNANames,targetVersion = "v20",exact = TRUE)
## *****
##
## The multiple matched miRNAs are list below:
##      original          Version v20          Accession
## 1 cel-lsy-6 cel-lsy-6&cel-lsy-6 MI0000801&MIMAT0000749

result2[c(341:345),]
##      OriginalName  TargetName  Accession
## 341 hsa-miR-520b hsa-miR-520b MIMAT0002843
## 342 mtr-miR399c mtr-miR399c MIMAT0001650
## 343 cel-miR-42-3p cel-miR-42-3p MIMAT0000013
## 344 osa-miR529a osa-miR529a MIMAT0002885
## 345 mtr-miR169j mtr-miR169j MIMAT0013321
```

## 4.2 Solution 2: miRNA Names conversion with three steps

The miRBase Accession can be a bridge to exactly match miRNA Name between two different miRBase versions. For a group of miRNA Names, users could apply the function `checkMiRNAVersion()` to check the possible miRNA version firstly. Then the miRNA Names accompanying with the version information are mapped to the Accessions using the function `miRNA_NameToAccession()`. In the last step, the Accessions can be easily mapped to the miRNA Names in the target version. This approach can output more exact result than the global searching and matching. [ `checkMiRNAVersion()-> miRNA_NameToAccession() -> miRNA_AccessionToName()` ]

```
library(miRBaseConverter)
data(miRNATest)
miRNANames = miRNATest$miRNA_Name

#### Step 1. Check the possible version for miRNAs
data(miRNATest)
miRNANames = miRNATest$miRNA_Name
version=checkMiRNAVersion(miRNANames, verbose = FALSE)

#### Step 2. miRNA Names to miRBase Accessions with the specific version information
result1 = miRNA_NameToAccession(miRNANames,version = version)

#### Step 3. miRBase Accessions to miRNA Names of the target version
result2 = miRNA_AccessionToName(result1[,2],targetVersion = "v22")
result2[c(341:345),]
```

```
##      Accession      TargetName
## 341 MIMAT0002843 hsa-miR-520b-3p
## 342 MIMAT0001650      mtr-miR399c
## 343 MIMAT0000013      cel-miR-42-3p
## 344 MIMAT0002885      osa-miR529a
## 345 MIMAT0011111      mtr-miR169b
```

## 5 The conversion between Precursor and Mature miRNA

---

A Precursor miRNA is about 70mer RNA with a stem-loop to form as a hairpin structure. The 5' UTR and/or 3' UTR of the stem-loop can be cleaved by dicer to generate one or two mature miRNAs ( about 22 nucleotides ). In *miRBaseConverter* package, we provide the functions for conversion between precursors and mature miRNAs.

### 5.1 Mature miRNA to Precursor

```
library(miRBaseConverter)
data(miRNAtest)
miRNANames=miRNAtest$miRNA_Name
result1=miRNA_MatureToPrecursor(miRNANames)
## The input miRNA version information: miRBase v18
head(result1)
##      OriginalName      Precursor
## 1 cel-miR-46-3p      cel-mir-46
## 2 cel-miR-81-3p      cel-mir-81
## 3 cel-miR-1817      cel-mir-1817
## 4 hsa-miR-196a-5p      hsa-mir-196a-1
## 5 mmu-miR-149-5p      mmu-mir-149
## 6 mtr-miR166d      mtr-MIR166d
```

### 5.2 Precursor to Mature miRNA

```
library(miRBaseConverter)
miRNANames=c("pma-mir-100a","sko-mir-92a","hsa-mir-6131","mtr-MIR2655i",
"mmu-mir-153","mtr-MIR2592am","mml-mir-1239","xtr-mir-128-2","oan-mir-100",
"mmu-mir-378b","hsa-miR-508-5p","mmu-miR-434-3p")
result2=miRNA_PrecursorToMature(miRNANames)
## The input miRNA version information: miRBase v22
head(result2)
##      OriginalName      Mature1      Mature2
## 1 pma-mir-100a      pma-miR-100a-5p      pma-miR-100a-3p
## 2 sko-mir-92a      sko-miR-92a      <NA>
## 3 hsa-mir-6131      hsa-miR-6131      <NA>
```

```
## 4 mtr-MIR2655i mtr-miR2655i <NA>
## 5 mmu-mir-153 mmu-miR-153-5p mmu-miR-153-3p
## 6 mtr-MIR2592am mtr-miR2592am <NA>
```

## 6 Retrieve the Family category of miRNAs

miRNAs are manually classified by the single-linkage method to cluster the precursor sequences based on BLAST hits and adjusted manually the clustered families by multiple sequence alignment in *miRBase*. The family classification is based on a common ancestor for each family representing sequences. Normally, the miRNAs from the same family may possess similar physiological functions in cell metabolism. In *miRBaseConverter* package, the function `checkMiRNAFamily()` is specifically designed for the retrieval information of miRNA families. It can be applied to retrieve the miRNA families and family accessions for a list of miRNAs.

```
library(miRBaseConverter)
## The input is miRNA Accessions
Accessions=miRNATest$Accession
Family_Info1=checkMiRNAFamily(Accessions)
head(Family_Info1)
##      Accession  miRNAName_v21 FamilyAccession  Family
## 1 MIMAT0000017 cel-miR-46-3p MIPF0000087 mir-46
## 2 MIMAT0000054 cel-miR-81-3p MIPF0000154 mir-81
## 3 MIMAT0006584 cel-miR-1817 <NA> <NA>
## 4 MIMAT0000226 hsa-miR-196a-5p MIPF0000031 mir-196
## 5 MIMAT0000159 mmu-miR-149-5p MIPF0000274 mir-149
## 6 MIMAT0011068 mtr-miR166d MIPF0000004 MIR166

##The input is miRNA names
miRNANames=miRNATest$miRNA_Name
version=checkMiRNAVersion(miRNANames,verbose = FALSE)
result=miRNA_NameToAccession(miRNANames,version=version)
Accessions=result$Accession
Family_Info2=checkMiRNAFamily(Accessions)
head(Family_Info2)
##      Accession  miRNAName_v21 FamilyAccession  Family
## 1 MIMAT0000017 cel-miR-46-3p MIPF0000087 mir-46
## 2 MIMAT0000054 cel-miR-81-3p MIPF0000154 mir-81
## 3 MIMAT0006584 cel-miR-1817 <NA> <NA>
## 4 MIMAT0000226 hsa-miR-196a-5p MIPF0000031 mir-196
## 5 MIMAT0000159 mmu-miR-149-5p MIPF0000274 mir-149
## 6 MIMAT0011068 mtr-miR166d MIPF0000004 MIR166
```

## 7 Retrieve some of detailed miRNA information in miRBase

### 7.1 Retrieve the Sequence of miRNAs

The miRNA sequence is great important for base alignment in the research of gene regulation. In *miRBaseConverter* package, we provide an efficient tool to batch retrieve the sequence of miRNAs based on the Accessions. It will be great help of automated analyses of sequence alignment between miRNAs and their target molecules.

```
library(miRBaseConverter)
data(miRNATest)
Accessions = miRNATest$Accession
result1 = getMiRNASequence(Accessions,targetVersion = "v13")
head(result1)
##      Accession      miRNASequence_v13
## 1 MIMAT0000017  UGUCAUGGAGUCGCUCUCUUCA
## 2 MIMAT0000054  UGAGAUCAUCGUGAAAGCUAGU
## 3 MIMAT0006584  UAGCCAAUGUCUUCUCUAUCAUG
## 4 MIMAT0000226  UAGGUAGUUUCAUGUUGUUGGG
## 5 MIMAT0000159  UCUGGCUCGUGUCUUCACUCCC
## 6 MIMAT0011068      <NA>

result2 = getMiRNASequence(Accessions,targetVersion = "v22")
head(result2)
##      Accession      miRNASequence_v22
## 1 MIMAT0000017  UGUCAUGGAGUCGCUCUCUUCA
## 2 MIMAT0000054  UGAGAUCAUCGUGAAAGCUAGU
## 3 MIMAT0006584  UAGCCAAUGUCUUCUCUAUCAUG
## 4 MIMAT0000226  UAGGUAGUUUCAUGUUGUUGGG
## 5 MIMAT0000159  UCUGGCUCGUGUCUUCACUCCC
## 6 MIMAT0011068  UCGGCCAGGCUUCAUCCCC
```

### 7.2 Retrieve all the miRBase version information

Currently, the latest [miRBase](#) version is 22 which was released in March 2018. In *miRBaseConverter* package, we implement a query function to check all the miRBase version information from miRBase version 1 to version 22. The return includes the information of the defined version names, release dates, the number of defined miRNAs (Entries including Precursors and Mature miRNAs) and the available status in *miRBaseConverter* package.

```
library(miRBaseConverter)
getAllVersionInfo()
##   Version   Date      Status hairpin.precursors matures species
## 1     v1 12/2002 Unavailable          218      NA      NA
## 2    v1_1 01/2003 Unavailable          262      NA      NA
## 3    v1_2 04/2003 Unavailable          295      NA      NA
## 4    v1_3 05/2003 Unavailable          332      NA      NA
```



## Additional file 1 — The vignette of miRBaseConverter

```
## 5    v1_4 07/2003 Unavailable      345     NA     NA
## 6      v2 07/2003 Unavailable      506     NA     NA
## 7    v2_1 09/2003 Unavailable      558     NA     NA
## 8    v2_2 11/2003 Unavailable      593     NA     NA
## 9      v3 01/2004 Unavailable      719     NA     NA
## 10   v3_1 04/2004 Unavailable      899     NA     NA
## 11    v4 07/2004 Unavailable     1185     NA     NA
## 12    v5 09/2004 Unavailable     1345     NA     NA
## 13   v5_1 12/2004 Unavailable     1420     NA     NA
## 14    v6 04/2005 Available       1650    1591     21
## 15    v7 06/2005 Unavailable     2909     NA     NA
## 16   v7_1 10/2005 Available       3424    3102     40
## 17    v8 02/2006 Available       3518    3229     41
## 18   v8_1 05/2006 Available       3963    3685     44
## 19   v8_2 07/2006 Available       4039    3834     45
## 20    v9 10/2006 Available       4361    4167     49
## 21   v9_1 02/2007 Available       4449    4274     49
## 22   v9_2 05/2007 Available       4584    4430     55
## 23   v10 08/2007 Available       5071    4922     58
## 24  v10_1 12/2007 Available       5395    5234     66
## 25   v11 04/2008 Available       6396    6211     72
## 26   v12 09/2008 Available       8619    8273     87
## 27   v13 03/2009 Available       9539    9169    103
## 28   v14 09/2009 Available      10883   10581    115
## 29   v15 04/2010 Available      14197   15632    133
## 30   v16 08/2010 Available      15172   17341    142
## 31   v17 04/2011 Available      16772   19724    153
## 32   v18 11/2011 Available      18226   21643    168
## 33   v19 08/2012 Available      21264   25141    193
## 34   v20 06/2013 Available      24521   30424    206
## 35   v21 06/2014 Available      28645   35828    223
## 36   v22 03/2018 Available      38589   48885    271
```

### 7.3 Retrieve all the available species in miRBase

miRBase has defined the miRNAs for hundreds of species. In *miRBaseConverter* package, users can apply the function `getAllSpecies()` to check the abbreviation and the full name of the available species.

```
library(miRBaseConverter)
allSpecies=getAllSpecies()
head(allSpecies)
##   Species division          name
## 1    aqu    AQU    Amphimedon queenslandica
## 2    nve    NVE    Nematostella vectensis
## 3    hma    HMA    Hydra magnipapillata
## 4    sko    SKO    Saccoglossus kowalevskii
## 5    spu    SPU    Strongylocentrotus purpuratus
## 6    cin    CIN    Ciona intestinalis
```

## Additional file 1 — The vignette of miRBaseConverter

```
##                                     tree NCBI-taxid
## 1                                 Metazoa;Porifera;    400682
## 2                                 Metazoa;Cnidaria;    45351
## 3                                 Metazoa;Cnidaria;    6085
## 4      Metazoa;Bilateria;Deuterostoma;Hemichordata;  10224
## 5      Metazoa;Bilateria;Deuterostoma;Echinodermata;  7668
## 6 Metazoa;Bilateria;Deuterostoma;Chordata;Urochordata;  7719
```

### 7.4 Retrieve all the available miRNAs in the specified miRBase version

In *miRBaseConverter* package, the function `getAllMiRNAs()` can be applied to get all miRNAs which are defined in each available miRBase version. Meanwhile, users can use the control parameters to custom the species and miRNA type in the output.

```
library(miRBaseConverter)
miRNAs=getAllMiRNAs(version="v22", type="all", species="hsa")
head(miRNAs)
##      Accession      Name
## 1  MI0000060  hsa-let-7a-1
## 2  MI0000061  hsa-let-7a-2
## 3  MIMAT0010195 hsa-let-7a-2-3p
## 4  MI0000062  hsa-let-7a-3
## 5  MIMAT0004481  hsa-let-7a-3p
## 6  MIMAT0000062  hsa-let-7a-5p
##
##                                     Sequence
## 1  UGGGAUGAGGUAGUAGGUUGUAUAGUUUUAGGGUCACACCCACCACUGGGAGUAACUAUACAUCUACUGUCUUUCCUA
## 2      AGGUUGAGGUAGUAGGUUGUAUAGUUUAGAAUUAUCAUCAAAGGGAGUAACUGUACAGCCUCCUAGCUUUCCU
## 3                                     CUGUACAGCCUCCUAGCUUUCC
## 4      GGGUGAGGUAGUAGGUUGUAUAGUUUGGGGCUCUGCCUGCUAUGGGUAACUAUACAUCUACUGUCUUUCCU
## 5                                     CUAUACAUCUACUGUCUUUC
## 6                                     UGAGGUAGUAGGUUGUAUAGUU
```

### 7.5 Retrieve all the history information of a single miRNA

In some applications, users may want to have a comprehensive investigation of a miRNA about the Name, Accession, Sequence, Precursor and mature miRNA information. The *miRBaseConverter* package embeds a useful function `getMiRNAHistory()` to retrieve all the detailed miRNA information in all miRBase historic version. Users can get a comprehensive overview of the miRNA.

```
#### 1. The input is a miRNA Name
name = "hsa-miR-26b-5p"
result1 = miRNA_NameToAccession(name)
Accession = result1$Accession
result2 = getMiRNAHistory(Accession)
result2
##      Precursor
```

## Additional file 1 — The vignette of miRBaseConverter

```

## v6 hsa-mir-26b
## v7_1 hsa-mir-26b
## v8 hsa-mir-26b
## v8_1 hsa-mir-26b
## v8_2 hsa-mir-26b
## v9 hsa-mir-26b
## v9_1 hsa-mir-26b
## v9_2 hsa-mir-26b
## v10 hsa-mir-26b
## v10_1 hsa-mir-26b
## v11 hsa-mir-26b
## v12 hsa-mir-26b
## v13 hsa-mir-26b
## v14 hsa-mir-26b
## v15 hsa-mir-26b
## v16 hsa-mir-26b
## v17 hsa-mir-26b
## v18 hsa-mir-26b
## v19 hsa-mir-26b
## v20 hsa-mir-26b
## v21 hsa-mir-26b
## v22 hsa-mir-26b
##
## PrecursorSequence
## v6 CCGGGACCCAGUUCAAGUAAUUCAGGAUAGGUUGUGUGCUGUCCAGCCUGUUCUCCAUAUACUUGGCUCGGGGACCGG
## v7_1 CCGGGACCCAGUUCAAGUAAUUCAGGAUAGGUUGUGUGCUGUCCAGCCUGUUCUCCAUAUACUUGGCUCGGGGACCGG
## v8 CCGGGACCCAGUUCAAGUAAUUCAGGAUAGGUUGUGUGCUGUCCAGCCUGUUCUCCAUAUACUUGGCUCGGGGACCGG
## v8_1 CCGGGACCCAGUUCAAGUAAUUCAGGAUAGGUUGUGUGCUGUCCAGCCUGUUCUCCAUAUACUUGGCUCGGGGACCGG
## v8_2 CCGGGACCCAGUUCAAGUAAUUCAGGAUAGGUUGUGUGCUGUCCAGCCUGUUCUCCAUAUACUUGGCUCGGGGACCGG
## v9 CCGGGACCCAGUUCAAGUAAUUCAGGAUAGGUUGUGUGCUGUCCAGCCUGUUCUCCAUAUACUUGGCUCGGGGACCGG
## v9_1 CCGGGACCCAGUUCAAGUAAUUCAGGAUAGGUUGUGUGCUGUCCAGCCUGUUCUCCAUAUACUUGGCUCGGGGACCGG
## v9_2 CCGGGACCCAGUUCAAGUAAUUCAGGAUAGGUUGUGUGCUGUCCAGCCUGUUCUCCAUAUACUUGGCUCGGGGACCGG
## v10 CCGGGACCCAGUUCAAGUAAUUCAGGAUAGGUUGUGUGCUGUCCAGCCUGUUCUCCAUAUACUUGGCUCGGGGACCGG
## v10_1 CCGGGACCCAGUUCAAGUAAUUCAGGAUAGGUUGUGUGCUGUCCAGCCUGUUCUCCAUAUACUUGGCUCGGGGACCGG
## v11 CCGGGACCCAGUUCAAGUAAUUCAGGAUAGGUUGUGUGCUGUCCAGCCUGUUCUCCAUAUACUUGGCUCGGGGACCGG
## v12 CCGGGACCCAGUUCAAGUAAUUCAGGAUAGGUUGUGUGCUGUCCAGCCUGUUCUCCAUAUACUUGGCUCGGGGACCGG
## v13 CCGGGACCCAGUUCAAGUAAUUCAGGAUAGGUUGUGUGCUGUCCAGCCUGUUCUCCAUAUACUUGGCUCGGGGACCGG
## v14 CCGGGACCCAGUUCAAGUAAUUCAGGAUAGGUUGUGUGCUGUCCAGCCUGUUCUCCAUAUACUUGGCUCGGGGACCGG
## v15 CCGGGACCCAGUUCAAGUAAUUCAGGAUAGGUUGUGUGCUGUCCAGCCUGUUCUCCAUAUACUUGGCUCGGGGACCGG
## v16 CCGGGACCCAGUUCAAGUAAUUCAGGAUAGGUUGUGUGCUGUCCAGCCUGUUCUCCAUAUACUUGGCUCGGGGACCGG
## v17 CCGGGACCCAGUUCAAGUAAUUCAGGAUAGGUUGUGUGCUGUCCAGCCUGUUCUCCAUAUACUUGGCUCGGGGACCGG
## v18 CCGGGACCCAGUUCAAGUAAUUCAGGAUAGGUUGUGUGCUGUCCAGCCUGUUCUCCAUAUACUUGGCUCGGGGACCGG
## v19 CCGGGACCCAGUUCAAGUAAUUCAGGAUAGGUUGUGUGCUGUCCAGCCUGUUCUCCAUAUACUUGGCUCGGGGACCGG
## v20 CCGGGACCCAGUUCAAGUAAUUCAGGAUAGGUUGUGUGCUGUCCAGCCUGUUCUCCAUAUACUUGGCUCGGGGACCGG
## v21 CCGGGACCCAGUUCAAGUAAUUCAGGAUAGGUUGUGUGCUGUCCAGCCUGUUCUCCAUAUACUUGGCUCGGGGACCGG
## v22 CCGGGACCCAGUUCAAGUAAUUCAGGAUAGGUUGUGUGCUGUCCAGCCUGUUCUCCAUAUACUUGGCUCGGGGACCGG
##
## Mature1 Mature1Sequence Mature2
## v6 hsa-miR-26b UUCAAGUAAUUCAGGAUAGGUU <NA>
## v7_1 hsa-miR-26b UUCAAGUAAUUCAGGAUAGGUU <NA>
## v8 hsa-miR-26b UUCAAGUAAUUCAGGAUAGGUU <NA>
## v8_1 hsa-miR-26b UUCAAGUAAUUCAGGAUAGGUU <NA>
## v8_2 hsa-miR-26b UUCAAGUAAUUCAGGAUAGGUU <NA>

```

## Additional file 1 — The vignette of miRBaseConverter

```
## v9      hsa-miR-26b UUCAAGUAAUUCAGGAUAGGUU      <NA>
## v9_1    hsa-miR-26b UUCAAGUAAUUCAGGAUAGGUU      <NA>
## v9_2    hsa-miR-26b UUCAAGUAAUUCAGGAUAGGUU      <NA>
## v10     hsa-miR-26b UUCAAGUAAUUCAGGAUAGGU      hsa-miR-26b*
## v10_1   hsa-miR-26b UUCAAGUAAUUCAGGAUAGGU      hsa-miR-26b*
## v11     hsa-miR-26b UUCAAGUAAUUCAGGAUAGGU      hsa-miR-26b*
## v12     hsa-miR-26b UUCAAGUAAUUCAGGAUAGGU      hsa-miR-26b*
## v13     hsa-miR-26b UUCAAGUAAUUCAGGAUAGGU      hsa-miR-26b*
## v14     hsa-miR-26b UUCAAGUAAUUCAGGAUAGGU      hsa-miR-26b*
## v15     hsa-miR-26b UUCAAGUAAUUCAGGAUAGGU      hsa-miR-26b*
## v16     hsa-miR-26b UUCAAGUAAUUCAGGAUAGGU      hsa-miR-26b*
## v17     hsa-miR-26b UUCAAGUAAUUCAGGAUAGGU      hsa-miR-26b*
## v18     hsa-miR-26b-5p UUCAAGUAAUUCAGGAUAGGU      hsa-miR-26b-3p
## v19     hsa-miR-26b-5p UUCAAGUAAUUCAGGAUAGGU      hsa-miR-26b-3p
## v20     hsa-miR-26b-5p UUCAAGUAAUUCAGGAUAGGU      hsa-miR-26b-3p
## v21     hsa-miR-26b-5p UUCAAGUAAUUCAGGAUAGGU      hsa-miR-26b-3p
## v22     hsa-miR-26b-5p UUCAAGUAAUUCAGGAUAGGU      hsa-miR-26b-3p
##
##           Mature2Sequence      Status
## v6                <NA> UNCHANGED
## v7_1              <NA>      <NA>
## v8                <NA> UNCHANGED
## v8_1              <NA> UNCHANGED
## v8_2              <NA> UNCHANGED
## v9                <NA> UNCHANGED
## v9_1              <NA> UNCHANGED
## v9_2              <NA> UNCHANGED
## v10     CCUGUUCUCCAUUACUUGGCUC UNCHANGED
## v10_1   CCUGUUCUCCAUUACUUGGCUC UNCHANGED
## v11     CCUGUUCUCCAUUACUUGGCUC UNCHANGED
## v12     CCUGUUCUCCAUUACUUGGCUC UNCHANGED
## v13     CCUGUUCUCCAUUACUUGGCUC UNCHANGED
## v14     CCUGUUCUCCAUUACUUGGCUC UNCHANGED
## v15     CCUGUUCUCCAUUACUUGGCUC UNCHANGED
## v16     CCUGUUCUCCAUUACUUGGCUC UNCHANGED
## v17     CCUGUUCUCCAUUACUUGGCUC UNCHANGED
## v18     CCUGUUCUCCAUUACUUGGCUC UNCHANGED
## v19     CCUGUUCUCCAUUACUUGGCUC UNCHANGED
## v20     CCUGUUCUCCAUUACUUGGCUC UNCHANGED
## v21     CCUGUUCUCCAUUACUUGGCUC UNCHANGED
## v22     CCUGUUCUCCAUUACUUGGCUC UNCHANGED
```

```
#### 2. The input is miRNA Accession Id
Accession = "MIMAT0000765"
result3 = getMiRNAHistory(Accession)
result3
##           Precursor
## v6      hsa-mir-335
## v7_1    hsa-mir-335
## v8      hsa-mir-335
## v8_1    hsa-mir-335
## v8_2    hsa-mir-335
```

## Additional file 1 — The vignette of miRBaseConverter

```

## v9 hsa-mir-335
## v9_1 hsa-mir-335
## v9_2 hsa-mir-335
## v10 hsa-mir-335
## v10_1 hsa-mir-335
## v11 hsa-mir-335
## v12 hsa-mir-335
## v13 hsa-mir-335
## v14 hsa-mir-335
## v15 hsa-mir-335
## v16 hsa-mir-335
## v17 hsa-mir-335
## v18 hsa-mir-335
## v19 hsa-mir-335
## v20 hsa-mir-335
## v21 hsa-mir-335
## v22 hsa-mir-335
##
## PrecursorSequence
## v6 UGUUUUGAGCGGGGUCAAGAGCAAUACGAAAAAUGUUUGUCAUAAACCGUUUUUCAUUUUGCUCCUGACCUCUCUCAUUUGCUAUUUAUUA
## v7_1 UGUUUUGAGCGGGGUCAAGAGCAAUACGAAAAAUGUUUGUCAUAAACCGUUUUUCAUUUUGCUCCUGACCUCUCUCAUUUGCUAUUUAUUA
## v8 UGUUUUGAGCGGGGUCAAGAGCAAUACGAAAAAUGUUUGUCAUAAACCGUUUUUCAUUUUGCUCCUGACCUCUCUCAUUUGCUAUUUAUUA
## v8_1 UGUUUUGAGCGGGGUCAAGAGCAAUACGAAAAAUGUUUGUCAUAAACCGUUUUUCAUUUUGCUCCUGACCUCUCUCAUUUGCUAUUUAUUA
## v8_2 UGUUUUGAGCGGGGUCAAGAGCAAUACGAAAAAUGUUUGUCAUAAACCGUUUUUCAUUUUGCUCCUGACCUCUCUCAUUUGCUAUUUAUUA
## v9 UGUUUUGAGCGGGGUCAAGAGCAAUACGAAAAAUGUUUGUCAUAAACCGUUUUUCAUUUUGCUCCUGACCUCUCUCAUUUGCUAUUUAUUA
## v9_1 UGUUUUGAGCGGGGUCAAGAGCAAUACGAAAAAUGUUUGUCAUAAACCGUUUUUCAUUUUGCUCCUGACCUCUCUCAUUUGCUAUUUAUUA
## v9_2 UGUUUUGAGCGGGGUCAAGAGCAAUACGAAAAAUGUUUGUCAUAAACCGUUUUUCAUUUUGCUCCUGACCUCUCUCAUUUGCUAUUUAUUA
## v10 UGUUUUGAGCGGGGUCAAGAGCAAUACGAAAAAUGUUUGUCAUAAACCGUUUUUCAUUUUGCUCCUGACCUCUCUCAUUUGCUAUUUAUUA
## v10_1 UGUUUUGAGCGGGGUCAAGAGCAAUACGAAAAAUGUUUGUCAUAAACCGUUUUUCAUUUUGCUCCUGACCUCUCUCAUUUGCUAUUUAUUA
## v11 UGUUUUGAGCGGGGUCAAGAGCAAUACGAAAAAUGUUUGUCAUAAACCGUUUUUCAUUUUGCUCCUGACCUCUCUCAUUUGCUAUUUAUUA
## v12 UGUUUUGAGCGGGGUCAAGAGCAAUACGAAAAAUGUUUGUCAUAAACCGUUUUUCAUUUUGCUCCUGACCUCUCUCAUUUGCUAUUUAUUA
## v13 UGUUUUGAGCGGGGUCAAGAGCAAUACGAAAAAUGUUUGUCAUAAACCGUUUUUCAUUUUGCUCCUGACCUCUCUCAUUUGCUAUUUAUUA
## v14 UGUUUUGAGCGGGGUCAAGAGCAAUACGAAAAAUGUUUGUCAUAAACCGUUUUUCAUUUUGCUCCUGACCUCUCUCAUUUGCUAUUUAUUA
## v15 UGUUUUGAGCGGGGUCAAGAGCAAUACGAAAAAUGUUUGUCAUAAACCGUUUUUCAUUUUGCUCCUGACCUCUCUCAUUUGCUAUUUAUUA
## v16 UGUUUUGAGCGGGGUCAAGAGCAAUACGAAAAAUGUUUGUCAUAAACCGUUUUUCAUUUUGCUCCUGACCUCUCUCAUUUGCUAUUUAUUA
## v17 UGUUUUGAGCGGGGUCAAGAGCAAUACGAAAAAUGUUUGUCAUAAACCGUUUUUCAUUUUGCUCCUGACCUCUCUCAUUUGCUAUUUAUUA
## v18 UGUUUUGAGCGGGGUCAAGAGCAAUACGAAAAAUGUUUGUCAUAAACCGUUUUUCAUUUUGCUCCUGACCUCUCUCAUUUGCUAUUUAUUA
## v19 UGUUUUGAGCGGGGUCAAGAGCAAUACGAAAAAUGUUUGUCAUAAACCGUUUUUCAUUUUGCUCCUGACCUCUCUCAUUUGCUAUUUAUUA
## v20 UGUUUUGAGCGGGGUCAAGAGCAAUACGAAAAAUGUUUGUCAUAAACCGUUUUUCAUUUUGCUCCUGACCUCUCUCAUUUGCUAUUUAUUA
## v21 UGUUUUGAGCGGGGUCAAGAGCAAUACGAAAAAUGUUUGUCAUAAACCGUUUUUCAUUUUGCUCCUGACCUCUCUCAUUUGCUAUUUAUUA
## v22 UGUUUUGAGCGGGGUCAAGAGCAAUACGAAAAAUGUUUGUCAUAAACCGUUUUUCAUUUUGCUCCUGACCUCUCUCAUUUGCUAUUUAUUA
##
## Mature1 Mature1Sequence Mature2
## v6 hsa-miR-335 UCAAGAGCAAUACGAAAAAUGU <NA>
## v7_1 hsa-miR-335 UCAAGAGCAAUACGAAAAAUGU <NA>
## v8 hsa-miR-335 UCAAGAGCAAUACGAAAAAUGU <NA>
## v8_1 hsa-miR-335 UCAAGAGCAAUACGAAAAAUGU <NA>
## v8_2 hsa-miR-335 UCAAGAGCAAUACGAAAAAUGU <NA>
## v9 hsa-miR-335 UCAAGAGCAAUACGAAAAAUGU <NA>
## v9_1 hsa-miR-335 UCAAGAGCAAUACGAAAAAUGU <NA>
## v9_2 hsa-miR-335 UCAAGAGCAAUACGAAAAAUGU <NA>
## v10 hsa-miR-335 UCAAGAGCAAUACGAAAAAUGU hsa-miR-335*
## v10_1 hsa-miR-335 UCAAGAGCAAUACGAAAAAUGU hsa-miR-335*

```

## Additional file 1 — The vignette of miRBaseConverter

```
## v11      hsa-miR-335 UCAAGAGCAAUACGAAAAAUGU  hsa-miR-335*
## v12      hsa-miR-335 UCAAGAGCAAUACGAAAAAUGU  hsa-miR-335*
## v13      hsa-miR-335 UCAAGAGCAAUACGAAAAAUGU  hsa-miR-335*
## v14      hsa-miR-335 UCAAGAGCAAUACGAAAAAUGU  hsa-miR-335*
## v15      hsa-miR-335 UCAAGAGCAAUACGAAAAAUGU  hsa-miR-335*
## v16      hsa-miR-335 UCAAGAGCAAUACGAAAAAUGU  hsa-miR-335*
## v17      hsa-miR-335 UCAAGAGCAAUACGAAAAAUGU  hsa-miR-335*
## v18      hsa-miR-335-5p UCAAGAGCAAUACGAAAAAUGU hsa-miR-335-3p
## v19      hsa-miR-335-5p UCAAGAGCAAUACGAAAAAUGU hsa-miR-335-3p
## v20      hsa-miR-335-5p UCAAGAGCAAUACGAAAAAUGU hsa-miR-335-3p
## v21      hsa-miR-335-5p UCAAGAGCAAUACGAAAAAUGU hsa-miR-335-3p
## v22      hsa-miR-335-5p UCAAGAGCAAUACGAAAAAUGU hsa-miR-335-3p
##
##           Mature2Sequence      Status
## v6                <NA> UNCHANGED
## v7_1               <NA>    <NA>
## v8                <NA> UNCHANGED
## v8_1              <NA> UNCHANGED
## v8_2              <NA> UNCHANGED
## v9                <NA> UNCHANGED
## v9_1              <NA> UNCHANGED
## v9_2              <NA> UNCHANGED
## v10      UUUUUCAUUUUUGCUCCUGACC UNCHANGED
## v10_1     UUUUUCAUUUUUGCUCCUGACC UNCHANGED
## v11      UUUUUCAUUUUUGCUCCUGACC UNCHANGED
## v12      UUUUUCAUUUUUGCUCCUGACC UNCHANGED
## v13      UUUUUCAUUUUUGCUCCUGACC UNCHANGED
## v14      UUUUUCAUUUUUGCUCCUGACC UNCHANGED
## v15      UUUUUCAUUUUUGCUCCUGACC UNCHANGED
## v16      UUUUUCAUUUUUGCUCCUGACC UNCHANGED
## v17      UUUUUCAUUUUUGCUCCUGACC UNCHANGED
## v18      UUUUUCAUUUUUGCUCCUGACC UNCHANGED
## v19      UUUUUCAUUUUUGCUCCUGACC UNCHANGED
## v20      UUUUUCAUUUUUGCUCCUGACC UNCHANGED
## v21      UUUUUCAUUUUUGCUCCUGACC UNCHANGED
## v22      UUUUUCAUUUUUGCUCCUGACC UNCHANGED
```

## 7.6 Retrieve the data table for the specified miRBase version

There is a data table for presenting the detailed information of the defined miRNAs in each miRBase version. In *miRBaseConverter* package, we provide a function `getMiRNATable()` to return the miRNA data table for each miRBase version. Meanwhile, users can use the control parameter to custom the species in output.

```
library(miRBaseConverter)
miRNA_Tab=getMiRNATable(version="v22",species="hsa")
head(miRNA_Tab)
##   Precursor_Acc  Precursor  Status
## 58      MI0000060 hsa-let-7a-1 UNCHANGED
## 59      MI0000061 hsa-let-7a-2 UNCHANGED
```

## Additional file 1 — The vignette of miRBaseConverter

```
## 60 MI0000062 hsa-let-7a-3 UNCHANGED
## 61 MI0000063 hsa-let-7b UNCHANGED
## 62 MI0000064 hsa-let-7c UNCHANGED
## 63 MI0000065 hsa-let-7d UNCHANGED
##
## Precursor_Seq
## 58 UGGG AUGAGGUAGUAGGUUGUAUAGUUUUAGGGUCACACCCACCACUGGGAGUAACUAUACAAUCUACUGUCUUUCCUA
## 59 AGGUUGAGGUAGUAGGUUGUAUAGUUUAGAAUUACAUCAAGGGAGUAACUGUACAGCCUCCUAGCUUUCCU
## 60 GGGUGAGGUAGUAGGUUGUAUAGUUUGGGGCUCUGCCUGCUAUGGGUAACUAUACAACUACUGUCUUUCCU
## 61 CGGGUGAGGUAGUAGGUUGUGUGUUUCAGGGCAGUGAUGUUGCCUCGGAAGUAACUAUACAACUACUGCCUCCUG
## 62 GCAUCCGGGUAGGUAGGUUGUAUAGUUUAGAGUUACACCCUGGGAGUUAACUGUACAACUUCUAGCUUUCCUUGGAGC
## 63 CCUAGGAAGGUAGUAGGUUGCAUAGUUUUAGGGCAGGGAUUUUGCCACAAGGAGGUAACUAUACGACCUGCUGCCUUUCCUJAG
## Mature1_Acc Mature1 Mature1_Seq Mature2_Acc
## 58 MIMAT0000062 hsa-let-7a-5p UGAGGUAGUAGGUUGUAUAGUU MIMAT0004481
## 59 MIMAT0000062 hsa-let-7a-5p UGAGGUAGUAGGUUGUAUAGUU MIMAT0010195
## 60 MIMAT0000062 hsa-let-7a-5p UGAGGUAGUAGGUUGUAUAGUU MIMAT0004481
## 61 MIMAT0000063 hsa-let-7b-5p UGAGGUAGUAGGUUGUGUGUU MIMAT0004482
## 62 MIMAT0000064 hsa-let-7c-5p UGAGGUAGUAGGUUGUAUGUU MIMAT0026472
## 63 MIMAT0000065 hsa-let-7d-5p AGAGGUAGUAGGUUGCAUAGUU MIMAT0004484
## Mature2 Mature2_Seq
## 58 hsa-let-7a-3p CUAUACAAUCUACUGUCUUUC
## 59 hsa-let-7a-2-3p CUGUACAGCCUCCUAGCUUUCC
## 60 hsa-let-7a-3p CUAUACAAUCUACUGUCUUUC
## 61 hsa-let-7b-3p CUAUACAACUACUGCCUCCU
## 62 hsa-let-7c-3p CUGUACAACUUCUAGCUUUCC
## 63 hsa-let-7d-3p CUAUACGACCUGCUGCCUUUCU
```

## 8 The online retrieving of miRNA information

### 8.1 Open the miRNA webpages in miRBase

In *miRBaseConverter* package, the function `goTo_miRBase()` redirects users to the miRBase webpages of some specified miRNAs.

```
library(miRBaseConverter)
Accessions=miRNATest$Accession[1:10]
goTo_miRBase(Accessions)
```

### 8.2 Open the miRNA family webpages in miRBase

In *miRBaseConverter* package, the function `goTo_miRNAFamily()` redirects users to the miRBase miRNA family webpages of some specified miRNA families.

```
library(miRBaseConverter)
Accessions=miRNATest$Accession
Family_Info=checkMiRNAFamily(Accessions)
FamilyAccessions=Family_Info$FamilyAccession[1:15]
goTo_miRNAFamily(FamilyAccessions)
```

## 9 Conclusion

---

The R/Bioconductor package *miRBaseConverter* provides a suite of tools for checking miRNA Name, Accession, Sequence, Species, Version, History and Family information in different miRBase versions. We wish that the *miRBaseConverter* package could be a useful tool for miRNA research community and help to speed up the studies of miRNAs.
